# Supplementary material for: Bovine Papillomavirus Type 1 Infection in an Equine Congenital Papilloma
Source: MDPI journal article supplement (doi:10.3390/pathogens12081059), 2023-08-18
Supplement: s1 [file s1]

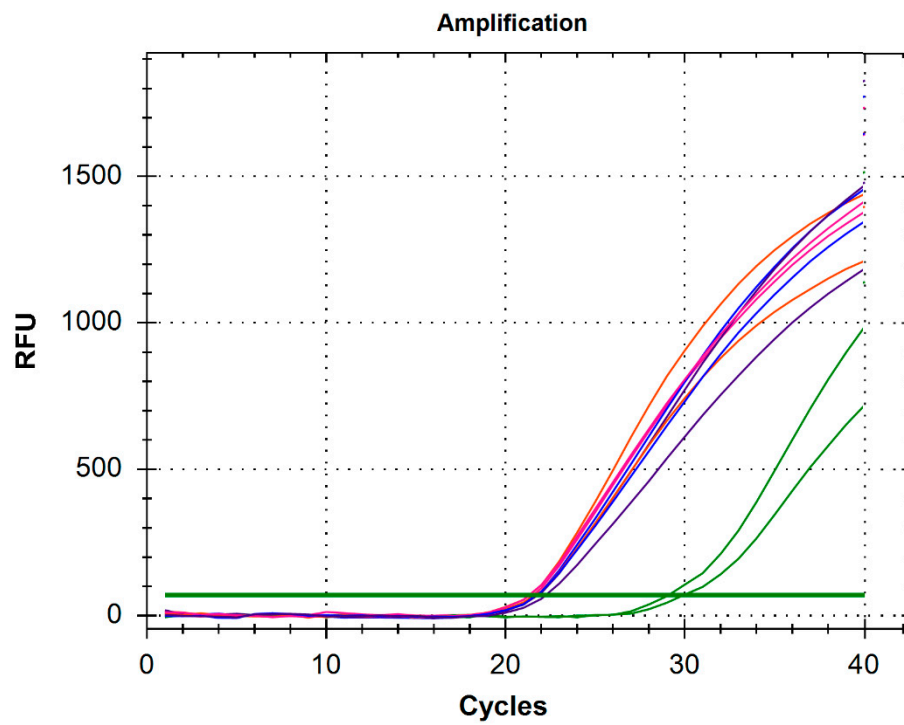

**Figure S1:** Curve of Real Time PCR to detection of BPV1

Different gene are showed by differents coulors:

Violet two replicats of L1

Green two replicates of B2M

Orange two replicates of E5

Blu two replicates of E6

Fuxia two replicates of E7
